# Supplementary material for: Effects of rock types and crushing mechanism on the 3D morphological parameters of manufactured sands: a combination study of 3D scanning and spherical harmonic analysis
Source: Frontiers journal article supplement (doi:10.3389/fbuil.2024.1393882), 2024-05-23
Supplement: Data_Sheet_1.docx [file Data_Sheet_1.docx]

**Appendix A. Spherical harmonic function**

The basic idea of the *SH* basis functions is to extend the polar radius of the particle surface from the unit sphere and to use the correlation coefficients of the SH series as a mathematical representation of the three-dimensional particle morphology, as shown in Eq. (A1).

|  | (A1) |
| --- | --- |

where, *r*(*θ*, *φ*) denotes the distance from the center to the particle surface; and are the spherical coordinates; is the SH function obtained by the Eq. (A2); *N* is the degree of the *SH* series, is the *SH* coefficients, which can be obtained by the Eq. (A4).

|  | (A2) |
| --- | --- |
|  | (A3) |

where,is the associated Legendre polynomial function given by Eq. (A3); *m* and *n* *a*re the degree and order of , *m=* (-*n*, -*n*+1, …, 0, …, *n*-1, *n*) and *n* < *N*. To visualize the variation mechanism of the spherical harmonic function, Fig. A.1 exhibits the basis image of 0-3rd order spherical harmonic function.

| 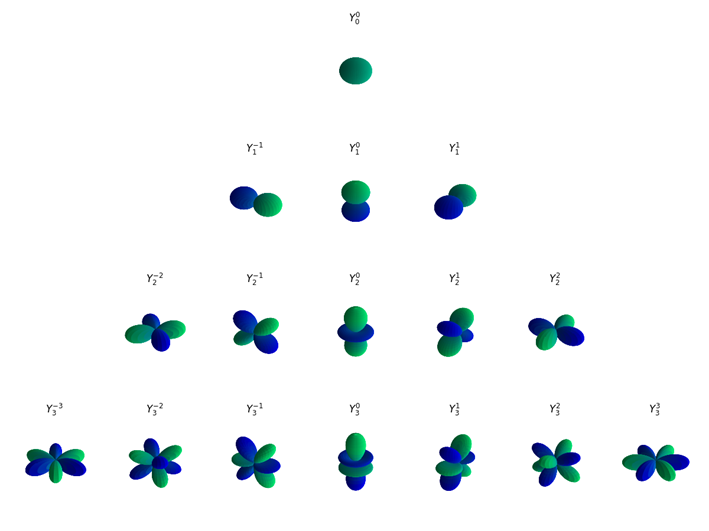 |
| --- |
| **Fig. A.1** Example of spherical harmonic function base image of order 0-3 |

Based on the calculated radius and the spherical function of the reconstructed point, with reference to Garboczi et al.，the spherical harmonic coefficients can be solved by Eq. (A4).

|  | (A4) |
| --- | --- |

Taking the surface vertices *r*(*θ*, *φ*) obtained from 3D scanning as the inputs to the left side of Eq (1), it is easy to determine by applying standard least-squares estimation to the linear equations. Thus, the 3D morphology of particles can be succinctly characterized by a set of .
